# 1                    **Structural insights into the galanin receptors signaling**

2

3 Authors and Affiliations:

4 **Wentong Jiang<sup>1,2</sup>, Sanduo Zheng<sup>1,3\*</sup>**

5 <sup>1</sup>National Institute of Biological Sciences, Beijing, China

6 <sup>2</sup>Graduate School of Peking Union Medical College, Beijing, China

7 <sup>3</sup>Tsinghua Institute of Multidisciplinary Biomedical Research, Tsinghua University, Beijing,  
8 China

9

## 10 **Abstract**

11 Galanin is a biologically active neuropeptide, and functions through three distinct G  
12 protein-coupled receptors (GPCRs), namely GALR1, GALR2 and GLAR3. GALR signaling  
13 plays important roles in regulating various physiological processes such as energy  
14 metabolism, neuropathic pain, epileptic activity, and sleep homeostasis. GALR1 and GALR3  
15 signal through the  $G_{i/o}$  pathway, whereas GALR2 signals mainly through the  $G_{q/11}$  pathway.  
16 However, the molecular basis for galanin recognition and G protein selectivity of GALRs  
17 remains poorly understood. Here, we report the cryoelectron microscopy structures of the  
18 GALR1- $G_o$  and the GALR2- $G_q$  complexes bound to the endogenous ligand galanin or spexin.  
19 The galanin peptide mainly adopts an alpha helical structure, which binds at the extracellular  
20 vestibule of the receptors, nearly parallel to the membrane plane without penetrating deeply  
21 into the receptor core. Structural analysis combined with functional studies reveals important  
22 structural determinants for the G protein selectivity of GALRs as well as other class A  
23 GPCRs. In addition, we show that the zinc ion is a negative allosteric regulator of GALR1 but  
24 not GALR2. Our studies provide insight into the mechanisms of G protein selectivity of  
25 GPCRs and highlight potential novel function of the neuromodulator zinc ion as a modulator  
26 of GPCR signaling in the central nervous system.

27

28

29 **Significance Statement**

30

31 Galanin exerts various physiological functions through galanin receptors, including  
32 antinociceptive activity, depression and sleep. Here, we reveal a distinct binding site and  
33 binding pose of galanin peptide in galanin receptors from that of the published structures of  
34 peptide-bound GPCRs. Moreover, our work show that the neuromodulator zinc ion  
35 negatively modulates galanin signaling in the central nervous system, and further advances  
36 our understanding of mechanisms of G protein selectivity of GPCRs. These unique features  
37 of galanin receptors can be exploited for rational design of subtype selective ligands for  
38 treatments of neurological disorders.

## 39 Introduction

40 Galanin is a 29 or 30-amino-acid peptide that was isolated from pig intestine in 1983 (1).  
41 Through its wide distribution in the nervous system and the endocrine system, galanin is  
42 involved in a variety of physiological functions, including regulation of hormones and  
43 neurotransmitters release, antinociceptive activity, depression and sleep/wake homeostasis  
44 (2, 3). The endogenous action of galanin is mediated through activation of three distinct  
45 receptor subtypes (GALR1-3), which belong to the class A of G protein-coupled receptors  
46 (GPCRs) family (4, 5).

47

48 GALR subtypes vary in their downstream signaling pathways and the tissue distribution.  
49 GALR1 and GLAR3 mainly couple to the inhibitory  $G_{\alpha_{i/o}}$  pathway, leading to the inhibition of  
50 the adenylyl cyclase activity and the decrease of the intracellular adenosine 3',5'-cyclic  
51 monophosphate (cAMP) level. By contrast, GALR2 mainly couples to the stimulatory  
52 pathway of  $G_{q/11}$ , inducing the formation of inositol triphosphate (IP3), which in turn  
53 increases the cytosolic  $Ca^{2+}$  level (3) (**Fig. 1A**). While GALR1 is particularly enriched in the  
54 nervous system, GALR2 and GALR3 are broadly distributed in brain as well as peripheral  
55 tissues. GALRs activation via overexpression or administration of galanin in the nervous  
56 system of animals suppresses seizure development and neuropathic pain behavior, and  
57 show anxiolytic and antidepressant effect (6-10). A missense mutation in galanin peptide  
58 was identified as a cause of temporal lobe epilepsy (TLE) (11). Moreover, galanin expression  
59 is upregulated in the injured neurons, and galanin has been shown to play a role in  
60 neuroprotection and neuronal regeneration (12, 13). Accumulating evidence indicate that  
61 GALRs signaling is a key regulator of both sleep time and sleep/awake homeostasis in  
62 model organisms such as zebrafish and mouse (14, 15). Therefore, GALRs are potential  
63 therapeutic targets for the treatment of pain, epilepsy, depression, neuron injury and sleep  
64 disorders.

65

66 In addition to galanin, the endogenous galanin-like peptide (GALP) and spexin have been

67 shown to activate GALRs (16, 17). Although these peptides share high sequence similarity,  
68 they show distinct receptor binding preference. In contrast to galanin that interacts with all  
69 three receptor subtypes, spexin specifically activate GALR2 and GALR3. Homology  
70 modeling and site directed mutagenesis studies revealed the essential residues of galanin  
71 involved in the receptor binding and activation, and the potential galanin binding site of  
72 GALRs (18, 19). However, the molecular details of galanin binding and the peptide  
73 selectivity of GALRs remain poorly defined at the molecular level. Moreover, little is known  
74 about the molecular basis of G protein coupling specificity of GALRs. To gain insight into the  
75 molecular basis of ligand recognition and ligand selectivity of GALRs and extend our  
76 understanding of G protein selectivity, we sought to determine the cryoelectron microscopy  
77 (cryo-EM) structures of GALR1 and GALR2 in complex with G<sub>o</sub> and G<sub>q</sub> heterotrimer  
78 respectively.

79

80

## 81 Results

### 82 Structure determination

83 To obtain stable GPCR-G protein complexes, we used engineered thermostable mini-G  
84 proteins, which only contain the GTPase domain of  $G\alpha$  but still bind to  $G\beta\gamma$  heterodimer and  
85 recapitulate the pharmacological and structural changes in GPCRs induced by the full-length  
86  $G\alpha$  proteins (20). Moreover, the N-terminal residues of  $\alpha N$  in mini-G $\alpha o$  and mini-G $\alpha q$  were  
87 replaced by the equivalent residues of  $G\alpha i$  to acquire the ability to bind the antibody  
88 fragment scFv16 that stabilizes the nucleotide-free GPCR-G protein complex (21).  
89 Furthermore, we introduced a linker that contains a 3C protease cleavage site, between the  
90 C-terminus of the receptor and the N-terminus of the mini-G $\alpha$  to create a GPCR-G fusion  
91 protein. The GALR1-mini-G $\alpha o$  or GALR2-mini-G $\alpha q$  fusion protein was transiently expressed  
92 in Expi293 cell, and was assembled with purified  $G\beta 1\gamma 2$  and scFv16 in the presence of  
93 galanin (**SI Appendix, Fig. S1**). The resulting GALR1-mini-G $\alpha o$  complexes were co-eluted  
94 and mono-disperse with or without 3C protease treatment from the size exclusion  
95 chromatography, indicating that GALR1 forms a stable complex with mini-G $\alpha o$  (**SI Appendix,**  
96 **Figs. S1A-1C**). The peak fraction corresponding to the complexes were concentrated and  
97 subjected to cryo-EM single particle analysis. 2D class average analysis showed that the  
98 GALR1-mini-G fusion protein complex gives more orientations than the GALR1-mini-G  
99 complex without a linker between the receptor and mini-G $\alpha$  (**SI Appendix, Figs. S1D and**  
100 **S1E**). Combination of the two datasets enables us to obtain a final cryo-EM map of the  
101 GALR1-mini-G $\alpha o$  complex at a global nominal resolution of 3.3 Å (**SI Appendix, Fig. S2 and**  
102 **Table S1**). The structure of the galanin- and spexin-bound GALR2-mini-G $\alpha q$  fusion complex  
103 was determined to a nominal resolution of 3.3 Å and 3.5 Å, respectively (**SI Appendix, Fig.**  
104 **S3 and Table S1**). The high quality EM map allowed us to unambiguously assign side  
105 chains of the galanin peptide 1-17 and the most amino acids of the receptors except the  
106 extreme terminal residues and some intracellular loops because of their high flexibility (**Fig.**  
107 **1 B and C**). The overall structure of the GALR1-G $\alpha o$  complex resembles that of the  
108 GALR2-G $\alpha q$  complex, with root-mean-square deviation values of 0.886 Å for the C $\alpha$  atoms of

109 the receptors and 0.604 Å for the Ca atoms of the G proteins.

110

### 111 **Comparison of galanin binding pockets of GALR1 and GALR2**

112 The existence of bulky aromatic amino acids and the high quality EM density map allowed  
113 us to unambiguously assign side chains of galanin (**Fig. 2A**). The N-terminal portion of  
114 galanin (residue 1-15) was well resolved due to its direct contact with the receptors, which is  
115 consistent with previous studies showing that the binding affinity of N-terminal region of  
116 galanin (1-16) for the receptors is comparable to the full-length galanin (22, 23). Moreover,  
117 the N-terminal region (1-16) but not the remaining part is highly conserved in GALP and  
118 spexin peptides (**SI Appendix, Fig. S4A**), both of which are able to activate the receptors,  
119 further supporting our structural observation. Galanin mainly forms an alpha helical structure  
120 when bound to the receptor as well as in solution itself (24, 25). It occupies at the  
121 extracellular vestibule of GALRs that is equivalent to the binding site of a positive allosteric  
122 agonist LY2119620 in M2R (26) (**SI Appendix, Fig. S4B**). It lays on top of the receptor,  
123 nearly parallel to the membrane plane and distant from the toggle switch W<sup>6,48</sup>, the  
124 conformational change of which is essential for the receptor activation. By contrast, most  
125 neuropeptide agonists of class A GPCRs such as endothelin, orexin and opioid peptides  
126 binds nearly perpendicular to the membrane plane with one end buried in the helical cavity  
127 and the other end interacting with the extracellular loops, and these peptides penetrate in  
128 proximity to the toggle switch (27-29) (**SI Appendix, Fig. S4B**). Galanin contacts all seven  
129 TM helices as well as extracellular loops ECL2 and ECL3, burying a surface area of 866 Å<sup>2</sup>,  
130 which accounts for the high affinity binding of galanin for GALRs in the sub-nanomolar range  
131 (30). GALR1 and GALR2 use overlapping but distinct set of residues to contact galanin,  
132 mostly via hydrophobic and hydrogen bond interactions (**Fig. 2**). The first N-terminal residue  
133 of G1 lies between TM1 and TM7, and is closer to TM1 of GALR1 than that of GALR2 (**Fig.**  
134 **2F**), which may explain that removal of G1 in galanin reduced its binding affinity for GALR1  
135 but not GALR2 (24). W2 is sandwiched between L277<sup>ECL3</sup> and F282<sup>7.32</sup> of GALR1 and  
136 makes additional hydrogen bond with S281<sup>7.31</sup> (**Fig. 2C**). Therefore, mutation of W2 in

137 galanin or F282<sup>7.32</sup> results in significant loss of binding for the receptors (18, 31). F282<sup>7.32A</sup>  
138 mutation in GALR1 almost abolished galanin potency (**Fig. 2G**), and F271<sup>7.32A</sup> mutation in  
139 GALR2 reduced galanin potency by nearly 100-fold (**Fig. 2H**). A7E mutation that was  
140 identified as a cause of TLE disease likely causes a clash with nearby hydrophobic residues,  
141 accounting for reduced binding affinity for GALRs (11) (**Fig. 2C**). Y9 penetrates into the  
142 receptor core, about 10 Å above the toggle switch (*SI Appendix, Fig. S4B*), and is  
143 hydrogen-bonded by Q92<sup>2.61</sup> in GALR1 or Q82<sup>2.61</sup> in GALR2 (**Figs. 2 C and E**). Mutation of  
144 Q92<sup>2.61</sup> or Q82<sup>2.61</sup> to alanine reduced galanin potency by almost 100-fold (**Figs. 2 G and H**).  
145 Our structural observation is also consistent with previous studies showing that W2 and Y9  
146 are vital for galanin binding to the receptors (31). However, because of distinct residues of  
147 ECL2 and ECL3 involved in binding galanin, the conformations of these regions are different  
148 between GALR1 and GALR2 (**Fig. 2F**). For instance, V274 in the ECL3 of GALR1 engages  
149 hydrophobic interaction with L11 (**Fig. 2C**), while the equivalent residue in GALR2, Q263  
150 rotates away from galanin due to its longer side chain and hydrophilic nature, resulting in the  
151 conformational change of ECL3 (**Fig. 2F**). As a result, V274G mutation reduced agonist  
152 potency by about 370-fold, while Q263A mutation showed little effect (**Figs. 2 G and H**).  
153 ECL2 forms an antiparallel β-sheet, which is a characteristic of peptide receptors. It covers  
154 galanin as a lid-like structure and forms extensive hydrophobic interactions with L4, P13 and  
155 V16. The residues in ECL2 of GALR1 involved in binding galanin have bulkier aromatic side  
156 chains than that in GALR2 (**Fig. 2F**). Mutations of the equivalent residues W188<sup>ECL2</sup> and  
157 H176<sup>ECL2</sup> in GALR1 and GALR2 respectively had distinct effect on galanin potency (**Fig. 2 G**  
158 **and H**), suggesting that ECL2 in GALR1 and GALR2 differently contribute to galanin binding.  
159 An endogenous peptide spexin has A7M and G8L mutations in galanin and specifically  
160 activates GALR2 and GALR3 (*SI Appendix, Fig. S4A*). Structure of the spexin-bound  
161 GALR2-Gq complex reveals that L8 in spexin likely clashes with the bulkier residue  
162 W188<sup>ECL2</sup> in GALR1 (*SI Appendix, Fig. S4C*), accounting for the specific binding of spexin  
163 for GALR2 and GALR3 (16). Owing to these conformational differences, R184<sup>5.35</sup> in GALR2  
164 but not K197<sup>5.35</sup> in GALR1 makes hydrogen bonds with the backbone of galanin (**Fig. 2F**).

165 As a result, R184<sup>5,35</sup> A mutation reduces galanin potency by about 10-fold, while K197<sup>5,35</sup> A  
166 mutation shows little effect (**Figs. 2 G and H**). Taken together, these results suggest that  
167 mechanisms of galanin recognition by GALR1 and GALR2 are not identical, which allows the  
168 development of selective ligands targeting a specific subtype.

169

## 170 **Activation mechanisms of GALR1 and GALR2**

171 The inactive structures of GALR1 and GALR2 predicted by Alphafold may represent  
172 ligand-free structure, in which TM helices loosely pack against each other to allow the  
173 access of galanin (32) (**Fig. 3A**). Upon galanin binding, the orthosteric site undergoes  
174 significant conformational change, as indicated by the inward displacement of the  
175 extracellular portions of TM2 and TM6 and the outward shift of the TM1 and TM7 (**Figs. 3 A**  
176 **and B**). These conformation changes account for the outward motion of TM6 and inward  
177 motion of TM7 in the intracellular side (**Fig. 3C**). The conformational changes of the toggle  
178 switch W<sup>6,48</sup> and P<sup>5,50</sup>I/V<sup>3,40</sup>F<sup>6,44</sup> motif are common features of the class A GPCR activation.  
179 In contrast to the most class A GPCRs, where the orthosteric sites are in close proximity to  
180 the toggle switch, galanin binding site is distant from it. Hydrophobic interactions between  
181 F275 in ECL3 of GALR1 and, L10 and L11 in galanin result in the downward shift of F275,  
182 which propagates to the downward movement of W260<sup>6,48</sup> via I266<sup>6,54</sup> and H263<sup>6,51</sup> (**Fig. 3B**).  
183 The downward shift of W<sup>6,48</sup> is associated with the conformational change of the  
184 P<sup>5,50</sup>I/V<sup>3,40</sup>F<sup>6,44</sup> motif, which allosterically disrupts the conserved ionic lock between R133<sup>3,50</sup>  
185 and D132<sup>3,49</sup>, leading to the outward displacement of TM6 (**Fig. 3C**). Inward displacement of  
186 TM7 in the intracellular side is observed in the active state of many other class A GPCRs, as  
187 indicated by the conformational change of NPXXY motif, in which Y303<sup>7,53</sup> forms a  
188 water-mediated hydrogen bond with Y220<sup>5,58</sup>. The inward displacement of TM7 is coupled  
189 by the outward shift of R285<sup>7,35</sup> that arises from its interaction with galanin. Although the key  
190 residues involved in receptor activation are conserved between GALR1 and GALR2, their  
191 conformations vary significantly (**Fig. 3D**). This is because the hydrophobic interaction  
192 between V274 in ECL3 and L11 in galanin exists in GALR1, while this interaction is absent in



193 GALR2 due to the substitution of V274 in Q263, which leads to the upward shift of F264<sup>ECL3</sup>  
194 as well as the toggle switch W<sup>6.48</sup> and PIF motif in GALR2, compared to the equivalent  
195 residues in GALR1 (**Fig. 3D**). To further support the important role of F275<sup>ECL3</sup>/F264<sup>ECL3</sup> in  
196 GALR receptors activation, mutation of F275 in GALR1 or F264 in GALR2 reduced galanin  
197 potency by almost 100-fold (**Figs. 2 G and H**). The conformation differences of residues  
198 involved in receptor activation contribute to the structural variation in the cytoplasmic pocket  
199 of GALR1 and GALR2 and may play a role in G protein selectivity.

200

### 201 **Zn<sup>2+</sup> is a negative allosteric modulator (NAM) of GALR1**

202 Previous studies have reported that Zn<sup>2+</sup> can inhibit galanin binding to the receptors (18). To  
203 further investigate the functional role of zinc ion in galanin receptors signaling, we used the  
204 NanoBiT complementation-based assay to assess the effect of Zn<sup>2+</sup> on activation of  
205 receptors by galanin in living cells. Mini-G proteins were used in the NanoBiT assay  
206 throughout this study, since they preserve appropriate coupling specificity, and can be  
207 recruited to the active GPCRs without further dissociation, which increases the  
208 signal-to-noise ratio in this assay. As expected, Zn<sup>2+</sup> diminished the effect of 1 μM galanin on  
209 GALR1 activation in a concentration dependent manner with an IC50 value of 47.2 μM (**Fig.**  
210 **4A**). The diminished effect of Zn<sup>2+</sup> is saturable, or has a “ceiling” level. In contrast, the  
211 diminished effect was observed in GALR2 when the concentration of Zn<sup>2+</sup> reached millimolar  
212 range that is above the physiological concentration, indicating that Zn<sup>2+</sup> had little effect on  
213 galanin-induced GALR2 activation. Our structures show that galanin receptors are enriched  
214 with histidine residues that may coordinate Zn<sup>2+</sup> underneath the orthosteric binding pocket  
215 (**Fig. 4B**). Comparison of primary sequences of GALR1 and GALR2 from different species  
216 revealed that H267<sup>6.55</sup> but not nearby histidine residues in GALR1 is mutated to Isoleucine in  
217 GALR2 (**SI Appendix, Fig. S5A**). As expected, the zinc effect was significantly abrogated in  
218 GALR1 when H267<sup>6.55</sup> was mutated, while H112<sup>3.29</sup>A, H263<sup>6.51</sup>F or H264<sup>6.52</sup>F mutation had  
219 little influence (**Fig. 4A and SI Appendix, Fig. S5B**). All these mutants of GALR1 can be  
220 activated by galanin, although the potency and efficacy of galanin for these mutants vary (**SI**

221 **Appendix, Fig. S5C).** We further tested the effect of  $Zn^{2+}$  on the concentration response  
222 curve of galanin.  $Zn^{2+}$  produced the concentration-dependent and saturable rightward shifts  
223 in the potency of galanin, and decreased the galanin maximum response as well (**Fig. 4C**).  
224 By contrast,  $Zn^{2+}$  had little effect on the galanin concentration-response curve of H267A  
225 mutant of GALR1 (**Fig. 4D**). H267 is located in the TM6 right below the galanin binding site.  
226 The extracellular part of TM6 near H267 moves inwards upon galanin binding, which leads  
227 to the receptor activation. As a result, when coordinated by H267 and other nearby residues,  
228  $Zn^{2+}$  likely rigidifies the extracellular part of TM6 and restricts its conformational change,  
229 attenuating galanin-induced receptor activation. The exact coordination pattern of  $Zn^{2+}$   
230 awaits further investigation. Nevertheless, these results indicate that  $Zn^{2+}$  is a NAM of  
231 GALR1.

232

### 233 **Structural determinants of Gi/o and Gq/11 selectivity**

234 A notable difference between structures of the GALR1-Go complex and the GALR2-Gq  
235 complex is the relative orientation of Go and Gq to the receptors (**Figs. 5 A and B**). When  
236 aligning the receptors, the  $\alpha 5$  of Gao is rotated around the “wavy hook” of  $\alpha 5$  by about  $14^\circ$   
237 toward TM5, compared with G $\alpha q$ . This orientation difference was also observed in the  
238 structures of M1 and M2 muscarinic receptors (M1R and M2R) bound to G11 and Go  
239 respectively (33). In addition, because of the different interaction interface of the receptor  
240 and G protein, the flexibility of intracellular loops (ICL) in GALR1 and GALR2 differs (**Figs.**  
241 **5A**). For instance, ICL1 is ordered in GALR2 owing to the hydrogen bond interaction  
242 between D312 in G $\beta$  and the main chain carbonyl group of G53 in ICL1, whereas it is flexible  
243 in GALR1 due to the absence of this interaction (**SI Appendix, Fig. S6A**). The ICL2 of most  
244 Gi/o-coupled receptors forms an alpha helical structure, where hydrophobic residues at  
245 position 34.51 engage weak hydrophobic interactions with the hydrophobic pocket of Gai/o  
246 formed by V34 from the  $\alpha N$ - $\beta 1$  loop, L195 from the  $\beta 2$ - $\beta 3$  loop and I343 and F336 from  $\alpha 5$   
247 (**SI Appendix, Fig. S6B**). However, the ICL2 of GALR1 is disordered because of the  
248 substitution of the hydrophobic residue L1313<sup>4,51</sup> in arginine and the absence of hydrophobic

249 interaction between the ICL2 of GALR1 and Gi (**Figs. 5 C and G**). By contrast, L131<sup>34.51</sup> in  
250 the ICL2 of GALR2 is buried deep in the hydrophobic pocket of Gαq formed by L34 from the  
251 αN-β1 loop, V79 from the β2-β3 loop, and F228, K232 and I235 from α5, and engages  
252 strong hydrophobic interactions. In addition, P130<sup>34.50</sup> at the junction of ICL1 and TM3 is  
253 stabilized through hydrophobic interactions with I235 and K232 in α5 of Gαq (**Fig. 5D**).  
254 Substitution of L131<sup>34.51</sup> or P130<sup>34.50</sup> in GALR2 in the equivalent residues in GALR1 impaired  
255 the ability of GALR2 to couple Gq (**SI Appendix, Fig. S7A**), accounting for the inability of  
256 GALR1 to couple Gq. However, substitutions of S140<sup>34.50</sup>, R141<sup>34.51</sup> and S149<sup>4.49</sup> in ICL2 of  
257 GALR1 with the equivalent residues in GALR2 have little effect on coupling efficiency  
258 between GALR1 and Gαi (**SI Appendix, Fig. S7B**), suggesting that ICL2 in GALR1 is not  
259 involved in Gi coupling. Remarkably, GALR1 acquires the ability to couple Gq, as indicated  
260 by the NanoBiT assay as well as the IP1 assay (**Fig. 5H and SI Appendix, Fig. S7C**), when  
261 residues in ICL2 of GALR1 are substituted with that of GALR2, further supporting the  
262 important role of ICL2 in Gq coupling.

263

264 To understand the structural mechanism of the inability of GALR2 to couple Gi, we  
265 compared the interaction details between the GALR1-Gi and the GALR2-Gq complexes  
266 and mainly focused on residues of GALR1 involved in Go coupling that are not conserved in  
267 GALR2. R133<sup>3.50</sup>, I137<sup>3.54</sup>, L224<sup>5.62</sup>, L227<sup>5.65</sup>, L231<sup>5.69</sup>, and T245<sup>6.33</sup> in TM3, TM5 and TM6 of  
268 GALR1 engage extensive hydrophobic interactions with the extreme C-terminal part of α5 in  
269 Go (**Fig. 5E**). Most of these residues are conserved in GALR2 (**Fig. 5F**). Mutations of  
270 conserved residues in GALR1 and GALR2 impair the recruitment of Gi and Gq, respectively  
271 (**SI Appendix, Figs. S7D-7G**). Nevertheless, a notable difference between GALR1 and  
272 GALR2 are in ICL3. S238<sup>ICL3</sup> and S235<sup>ICL3</sup> in ICL3 of GALR1 make hydrogen bonds with  
273 D341 in Gαo, and K237<sup>ICL3</sup> engages electrostatic interactions with residues in the GTPase  
274 domain of Gαo. All of three residues are mutated in GALR2, leading to loss of these  
275 interactions (**Fig. 5 E and F**). Mutations of S235<sup>ICL3</sup> and K237<sup>ICL3</sup> in GALR1 have modest  
276 effect on galanin potency, but dramatically reduced the maximum responses (**SI Appendix,**

277 **Figs. S7D and S7E).** Remarkably, GALR2 acquired the ability to bind Go, when ICL3  
278 (214-225) of GALR2 including the three residues were replaced by the equivalent residues  
279 in GALR1 (**Fig. 5A**). Taken together, our data suggest that ICL2 in GALR2 and ICL3 in  
280 GALR1 are critical for determining the Gq and Go selectivity, respectively.

### 281 **Structural determinants of Gs and Gq selectivity**

282 Although it has been shown that interactions between the hydrophobic residue at position  
283 34.51 of ICL2 and the hydrophobic pocket of  $G\alpha$  are essential for the efficient coupling of Gq  
284 and Gs (34), it remains unclear how Gq and Gs are selectively recognized. Comparison of  
285 structures of D1 dopamine receptor (D1R)-Gs and GALR2-Gq revealed key structural  
286 elements in the receptors that determine Gq and Gs selectivity. In the GALR2-Gq complex,  
287 the conformation of ICL2 is stabilized by salt bridge interactions between R<sup>34.57</sup> (M<sup>34.57</sup> in  
288 D1R) and D<sup>3.49</sup> of the DRY motif as well as a hydrogen bond between R<sup>34.57</sup> and Y(-4) in  
289  $G\alpha_q$ , while ICL2 of D1R is stabilized by a hydrogen bond between Y<sup>34.53</sup> (S<sup>34.53</sup> in GALR2)  
290 and D<sup>3.49</sup>, and a potential water-mediated hydrogen bond between Y<sup>3.49</sup> and Y(-4) in  $G\alpha_s$   
291 (**Fig. 6A**). Notably, Y<sup>34.53</sup>M/V<sup>34.57</sup> are prevalent in Gs-coupled receptors, while R<sup>34.57</sup> is  
292 enriched in Gq-coupled receptors (**Fig. 6D**). Mutations of YM in D1R and RS in GALR2  
293 significantly reduced the potency of dopamine and galanin, respectively (**Figs. 6 E and F**).  
294 Moreover, N(-3) (-1 indicates the last residue of  $G\alpha$ ) in  $G\alpha_q$  is inserted into a hydrophobic  
295 pocket formed by N<sup>2.40</sup>, F<sup>8.50</sup> and other nearby residues, whereas E(-3) flips outside this  
296 pocket, probably due to its longer side chain and negative-charge nature. Remarkably, when  
297 E(-3) in  $G\alpha_s$  but not the nearby residues L(-1) and Q(-5) was substituted with the equivalent  
298 residues in  $G\alpha_q$ , the coupling efficiency between GALR2 and Gs was significantly increased  
299 (**Fig. 6G**). These different interaction modes of GALR2-Gq and D1R-Gs account for the  
300 movement of  $\alpha 5$  in Gs toward TM6 and the outward movement of TM6 in D1R, compared to  
301 that in GALR2 (**Fig. 6B**), explaining that most Gs-coupled receptors display a larger TM6  
302 movement in the active state than Gq-coupled receptors. As a result of these conformational  
303 changes, Gs is closer to TM5 than Gq, highlighting the important role of TM5 in determining  
304 Gs selectivity. Indeed, TM5 in most Gs-coupled receptors have a C-terminal helical

305 extension, and previous studies have shown that the  $AV^{5.65}Q^{5.68}\Phi^{5.69}$  ( $\Phi$  represents  
306 hydrophobic residues) motif in TM5 is prevalent in receptors that exclusively couple to Gs  
307 and is critical for Gs coupling in D1R (35) (Companion paper). Residues at position 5.65 in  
308 Gs-coupled receptors prefer hydrophobic residues with small side chains such as alanine  
309 and valine because of its close distance from the hydrophobic pocket formed by L(-1), L(-2),  
310 and L(-7) in Gas (**Fig. 6C**). Mutation of A<sup>5.65</sup> in leucine would cause a clash with this pocket,  
311 and impaired the Gs coupling (Companion paper). In contrast, leucine is dominant at  
312 position 5.65 in Gq-coupled receptors, due to its long distance from the hydrophobic pocket  
313 formed by V(-1), L(-2), and L(-7) in Gαq (**Fig. 6C**). L<sup>5.65</sup>A mutation in GALR2 weakens the  
314 interaction with this hydrophobic pocket and thus significantly decreased galanin potency  
315 (**Fig. 6F**). However, it is noteworthy that Gs- and Gq-coupled receptors show sequence  
316 preference at some positions of ICL2 and TM5, but also accommodate various residues at  
317 these positions (**Fig. 6D**), partly because of diverse receptor-G protein interfaces and  
318 promiscuous coupling of some GPCRs.

319

## 320 Discussion

321 Here, we report cryo-EM structures of the GALR1-Go and GALR2-Gq complex using the  
322 GPCR-G protein fusion strategy. The structures revealed distinct mechanisms of galanin  
323 recognition and receptor activation for GALR1 and GALR2, which contribute to structural  
324 variation in the cytoplasmic pocket of the receptors and may play an important role in  
325 determining the G protein selectivity. Moreover, we showed that Zn<sup>2+</sup> is a negative allosteric  
326 modulator of GALR1 but not GALR2.

327

328 Zn<sup>2+</sup>, known as a neuromodulator, is widely distributed in the central nervous system (CNS),  
329 particularly enriched in the synaptic vesicles of glutamatergic neurons (36, 37). It is released  
330 to the synaptic cleft upon membrane depolarization, and modulates functions of ion  
331 channels and receptors on the pre- or post-synaptic membrane. It has been shown that zinc  
332 inhibits ionotropic glutamate AMPA and NMDA receptors, fine-tuning synaptic transmission  
333 in the brain (38, 39). GALR1 is expressed on both glutamatergic and GABAergic

334 postsynaptic neurons. The spatial colocalization of zinc and GALR1 makes it possible for  
335 zinc to regulate the function of GALR1. Moreover, the IC<sub>50</sub> of zinc on GALR1 activation is  
336 47.2  $\mu$ M, which is in the range of the physiological concentration of zinc (10 nM to 100  $\mu$ M)  
337 (40). Previous studies have also shown that zinc regulates endogenous ligand binding at  
338 several GPCRs including  $\beta$ 2 adrenergic receptors ( $\beta$ 2AR) (41), melanocortin receptors (42)  
339 and platelet-activating factor receptor (43). In this study, we showed that zinc attenuated  
340 GALR1 activation by galanin possibly through restricting the conformational change of TM6  
341 that leads to receptor activation. Further studies are required to address whether zinc  
342 modulates a large number of GPCRs in the CNS and fine-tunes GPCR signaling, as does  
343 sodium (44).

344

345 Combining published structures of the GPCR-Gi complexes, we can roughly divide the class  
346 A Gi-coupled receptors into three classes based on the interaction features between ICL2  
347 and G proteins: (i) receptors that exclusively couple to Gi and have a charge residue at the  
348 position 34.51 of ICL2 such as GALR1 and sphingosine-1-phosphate receptors (S1PR) (45);  
349 (ii) receptors that exclusively couple to Gi and have a hydrophobic residue at the position  
350 34.51 such as D3 dopamine receptor, M2 muscarinic receptor (M2R) and  $\mu$  opioid receptor  
351 (28, 33, 46); (iii) receptors that promiscuously couple to Gi and have a large hydrophobic  
352 residue at position 34.51 such as the neurotensin receptor 1 (NTSR1),  $\beta$ 2AR, and the  
353 cholecystinin A receptor (47, 48). In the first class, when bound to the receptor, ICL2 is  
354 disordered, or forms a random coil structure. Since there is no hydrophobic interaction  
355 between 34.51 and G $\alpha$ i, ICL2 in receptors of this class plays a distinct role in determining Gi  
356 coupling efficiency (45) (**SI Appendix, Fig. S8A**). In GALR1, ICL2 is not involved in Gi  
357 coupling, whereas in S1PR, ICL2 is involved in hydrophilic interactions with Gi, and is  
358 important for Gi coupling; In the second class, ICL2 forms an alpha helical structure, and the  
359 residue 34.51 of ICL2 is located outside and distant from the hydrophobic pocket of G $\alpha$ i  
360 formed by residues from the  $\alpha$ N- $\beta$ 1 loop, the  $\beta$ 2- $\beta$ 3 loop and  $\alpha$ 5, and engages weak  
361 hydrophobic interactions (**SI Appendix, Figs. S8B and S8C**). Mutation of this residue had

362 little effect on the Gi coupling or GDP release from Gi/o (49, 50); In the third class, similar to  
363 Gs- and Gq-coupled receptors, the residue 34.51 is located close to the middle of the  
364 hydrophobic pocket of G $\alpha$ i and engages strong hydrophobic interaction (**SI Appendix, Figs.**  
365 **S8E and S8F**). In addition, some receptors in this class such as NTSR1 have the other  
366 conformation, where the residue 34.51 is located outside the hydrophobic pocket (**SI**  
367 **Appendix, Fig. S8D**). Previous studies have shown that F<sup>34.51</sup>A mutant of  $\beta$ 2AR failed to  
368 activate Gi (50), suggesting that the hydrophobic interaction between ICL2 and Gi is very  
369 important for Gi coupling in the third class. Owing to the absence of or weak interaction  
370 between G $\alpha$ i and ICL2 in receptors that exclusively couple Gi, the cytoplasmic end of TM5  
371 and TM6, and ICL3 have strong interactions with G $\alpha$ i, and are critical for determining Gi  
372 selectivity (**SI Appendix, Fig. S8**).

373

374 It has been recognized that the distal part of  $\alpha$ 5 in G $\alpha$  plays a key role in determining G  
375 protein selectivity (51-53). We further identified a residue pair N/E(-3) in  $\alpha$ 5 of Gq/Gs that  
376 contributes to structural differences and selective interactions between the D1R-Gs and  
377 GALR2-Gq. Substitution of this residue in Gs can promote coupling of GALR2 to noncognate  
378 Gs. Moreover, we revealed several signature residues in ICL2 and TM5 that dominate in Gs-  
379 and Gq-coupled receptors. Thus, our results provide novel insights into the molecular  
380 mechanisms of G protein selectivity by class A GPCRs.

381

382

383 Figure legends:

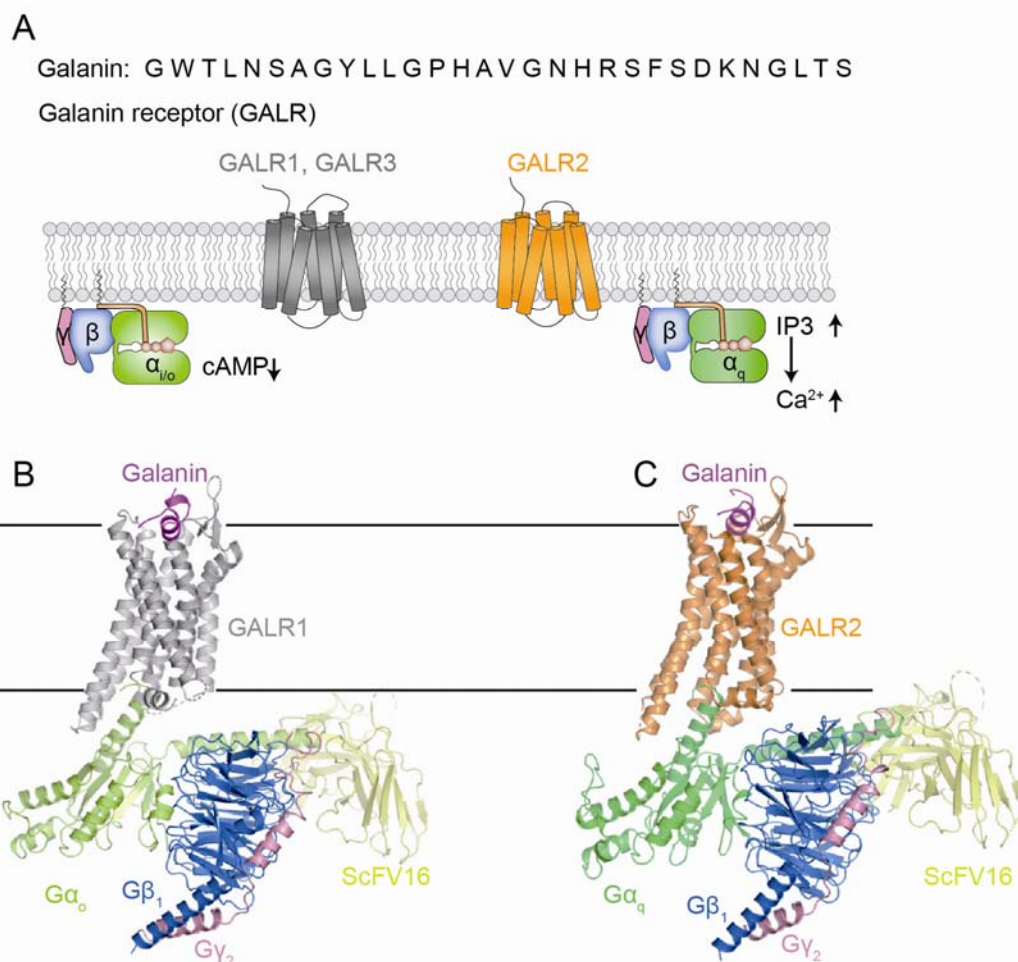

384

385

386 **Fig. 1. Overall structures of galatin-bound GALR1-miniGo-scFv16 and**  
387 **GALR2-miniGq-scFv16 complexes.**

388 (A) Schematic representation of GALR receptors signaling. GALR1 and GALR3 primarily  
389 couple to Gi/o, while GALR2 mainly signals through Gq.

390 (B) Cryo-EM structures of GALR1-miniGo-scFv16.

391 (C) Cryo-EM structures of GALR2-miniGq-scFv16.



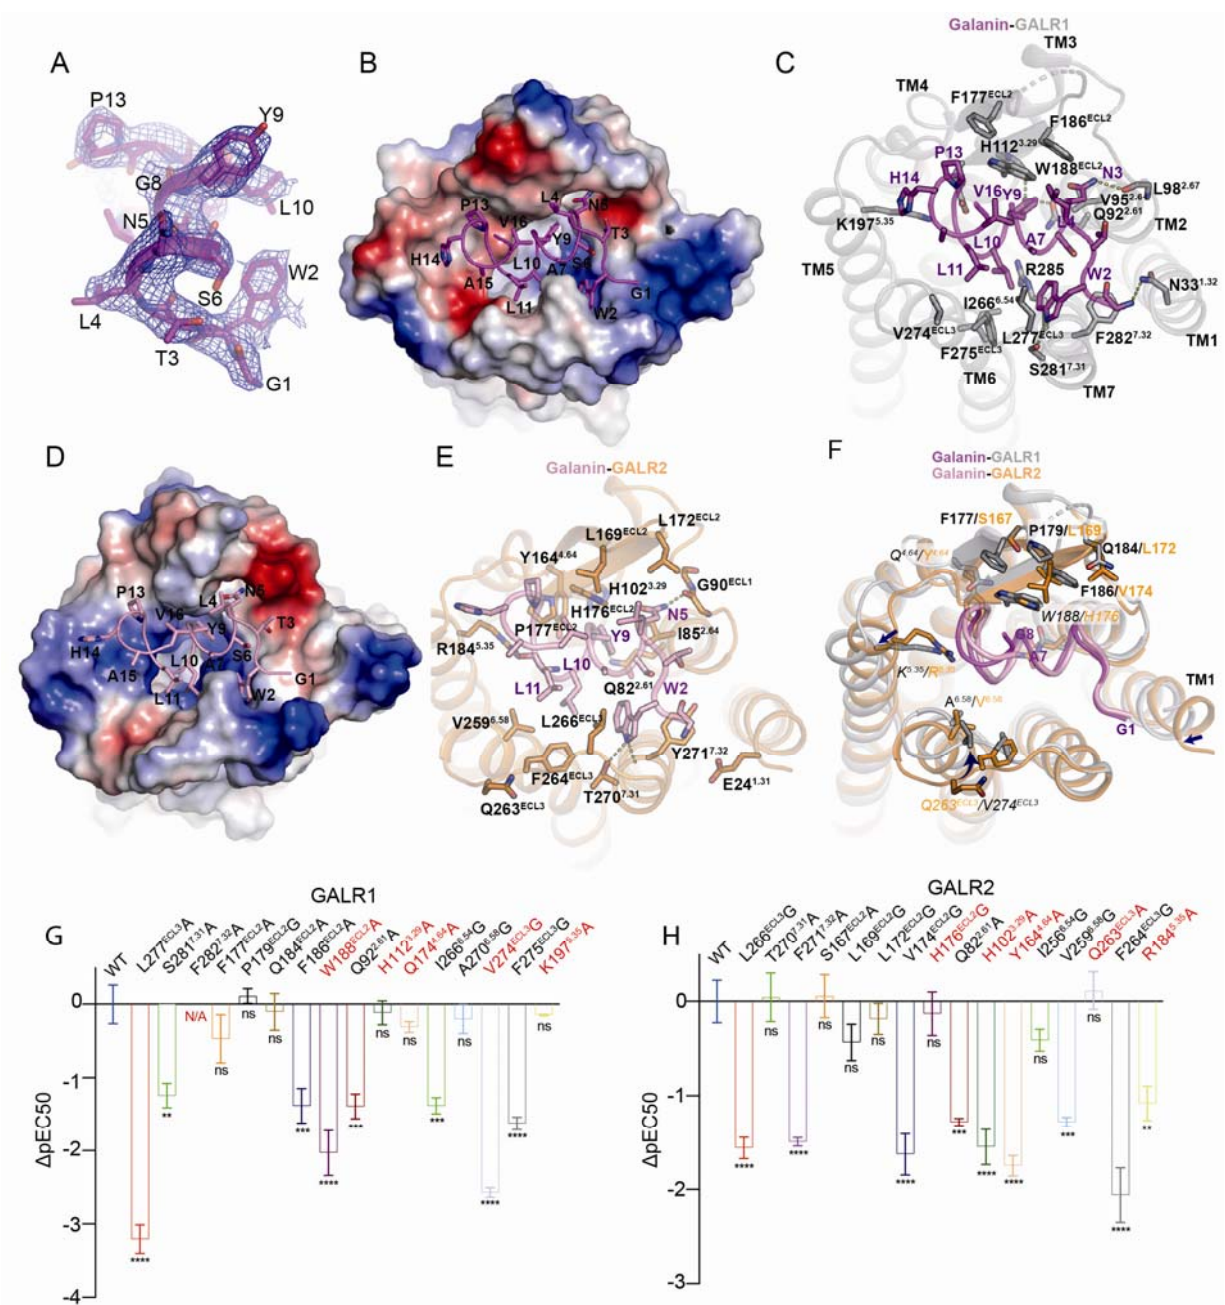

392

393 **Fig. 2. Mechanisms of galanin recognition by GALR1 and GALR2.**

394 (A) EM density map for galanin from the structure of the GALR2-Gq complex.

395 (B) Electrostatic potential surface of GALR1 and ribbon representation of galanin (magenta)

396 viewed from the extracellular side. Colors from red to blue represent negatively to positively

397 charged regions.

398 (C) Detailed interaction between GALR1 and galanin.

399 (D) Electrostatic potential of the GALR2-galanin interface is distinct from that of the

400 GALR1-galanin interface.

401 (E) Detailed interaction between GALR2 and galanin.

402 (F) Structural superposition of the GALR1-galanin and the GALR2-galanin complex. The

403 equivalent residues in GALR1 and GALR2 that play distinct roles in galanin binding are  
404 shown. Arrows indicate the conformational changes.  
405 (G) and (H) The effects of mutations in GALR1 and GALR2 on galanin potency as measured  
406 by the cAMP inhibition assay and the IP1 accumulation assay respectively. The equivalent  
407 residues that play distinct roles in GALR signaling are colored red. Data represent mean  $\pm$   
408 SEM of triplicate measurements in three independent experiments. Significance was  
409 analyzed using one-way ANOVA, \*\*\*\*P<0.0001, \*\*\*P<0.001, \*\*P<0.01.

410

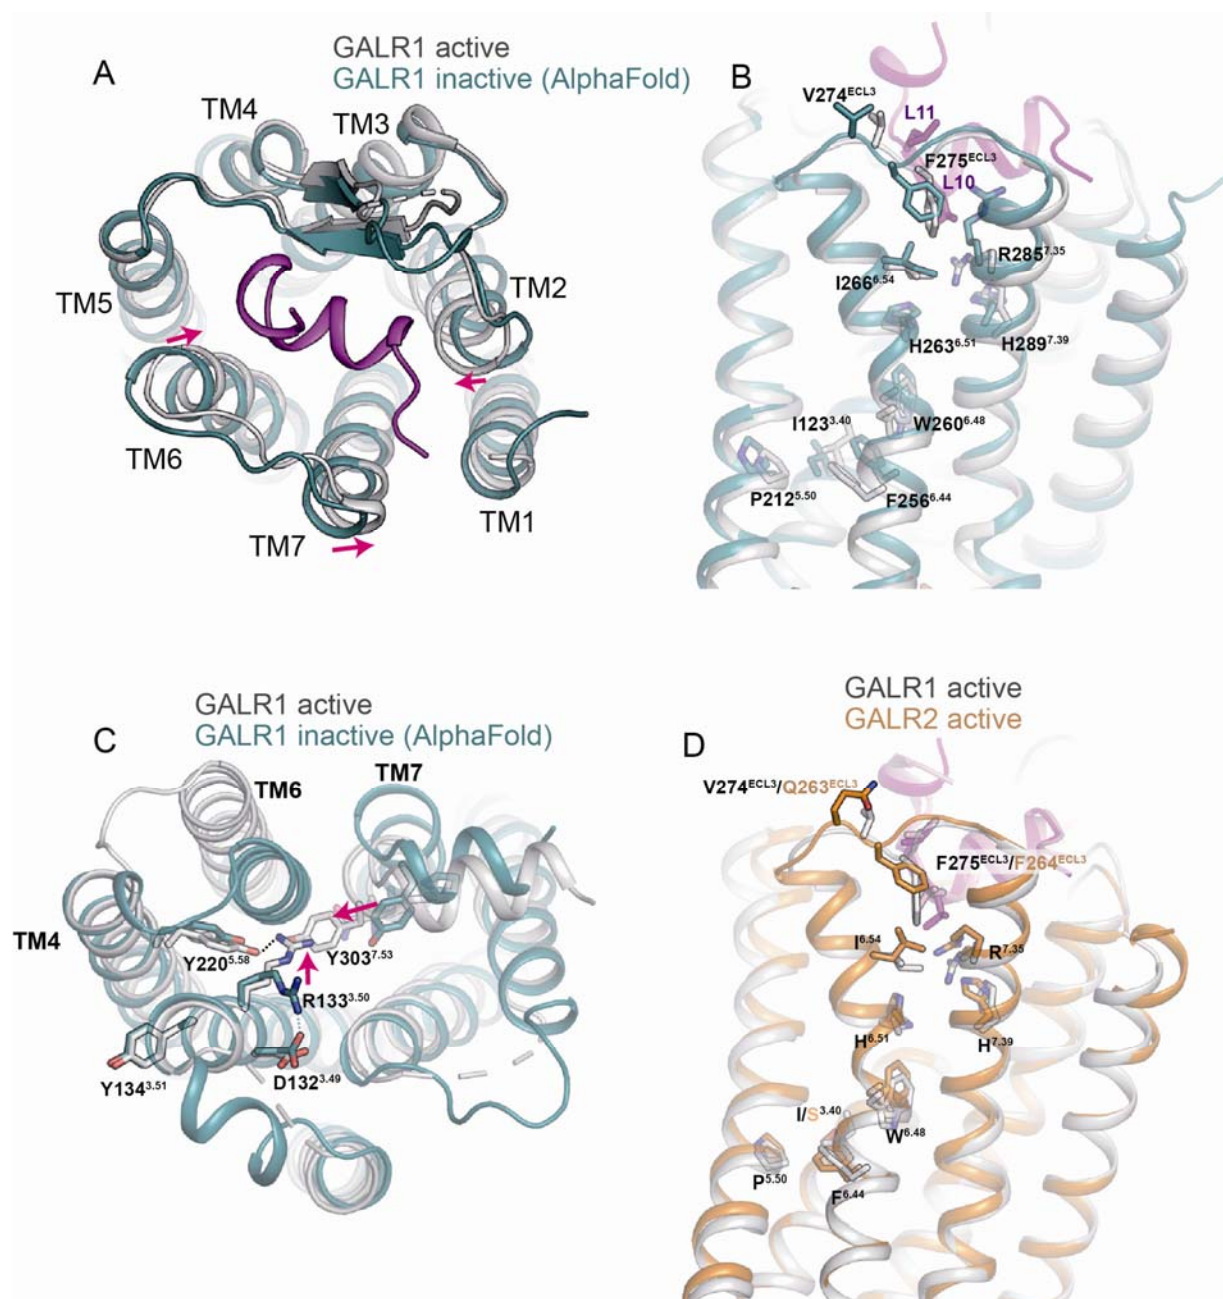

411

412 **Fig. 3. Mechanisms of GALR1 and GALR2 activation.**

413 (A) Structural overlay of GALR1 in the active and inactive state (predicted by AlphaFold).

414 (B) Conformational changes of the P<sup>5.50</sup>I<sup>3.40</sup>F<sup>6.44</sup> motif upon receptor activation.

415 (C) Conformational changes of residues in the cytoplasmic pocket including the  
416 D<sup>3.49</sup>R<sup>3.50</sup>Y<sup>3.51</sup> and the NPY motif upon receptor activation.

417 (D) Structural overlay of the active state of GALR1 and GALR2.

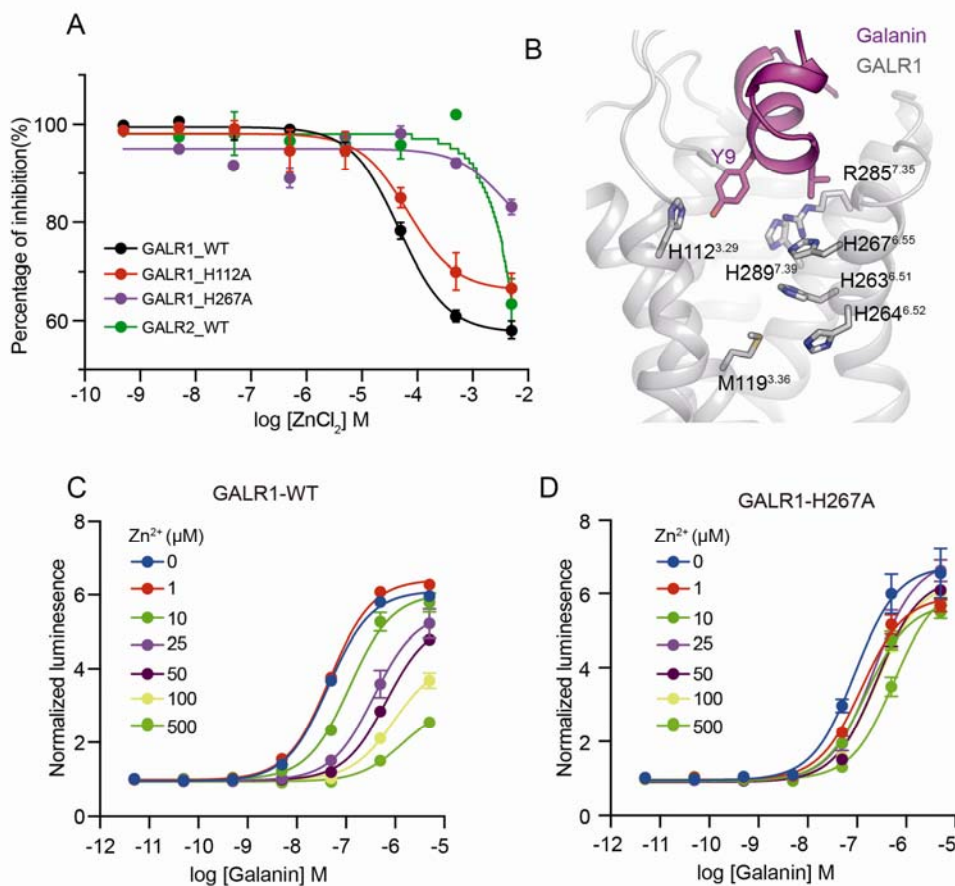

418

419 **Fig. 4. Zinc is a NAM of GALR1.**

420 (A) The effect of increasing concentration of zinc on receptor activation induced by 1 μM  
421 galanin, as evaluated by the NanoBiT assay, where the small fragment, and the large  
422 fragment are fused to the C-terminus of GALR1 and the N-terminus of mini-Go, respectively.  
423 The luminescence signals are normalized as percentages of the initial response of GALR1  
424 to galanin without zinc treatment.

425 (B) Histidine residues are enriched underneath the galanin binding pocket of GALR1.

426 (C) and (D) The actions of increasing concentration of zinc on the galanin dose-response  
427 curve of WT (C) and H267A mutant (D) of GALR1 measured by the NanoBiT assay. The  
428 luminescence signals are normalized to the vehicle treatment as fold change.

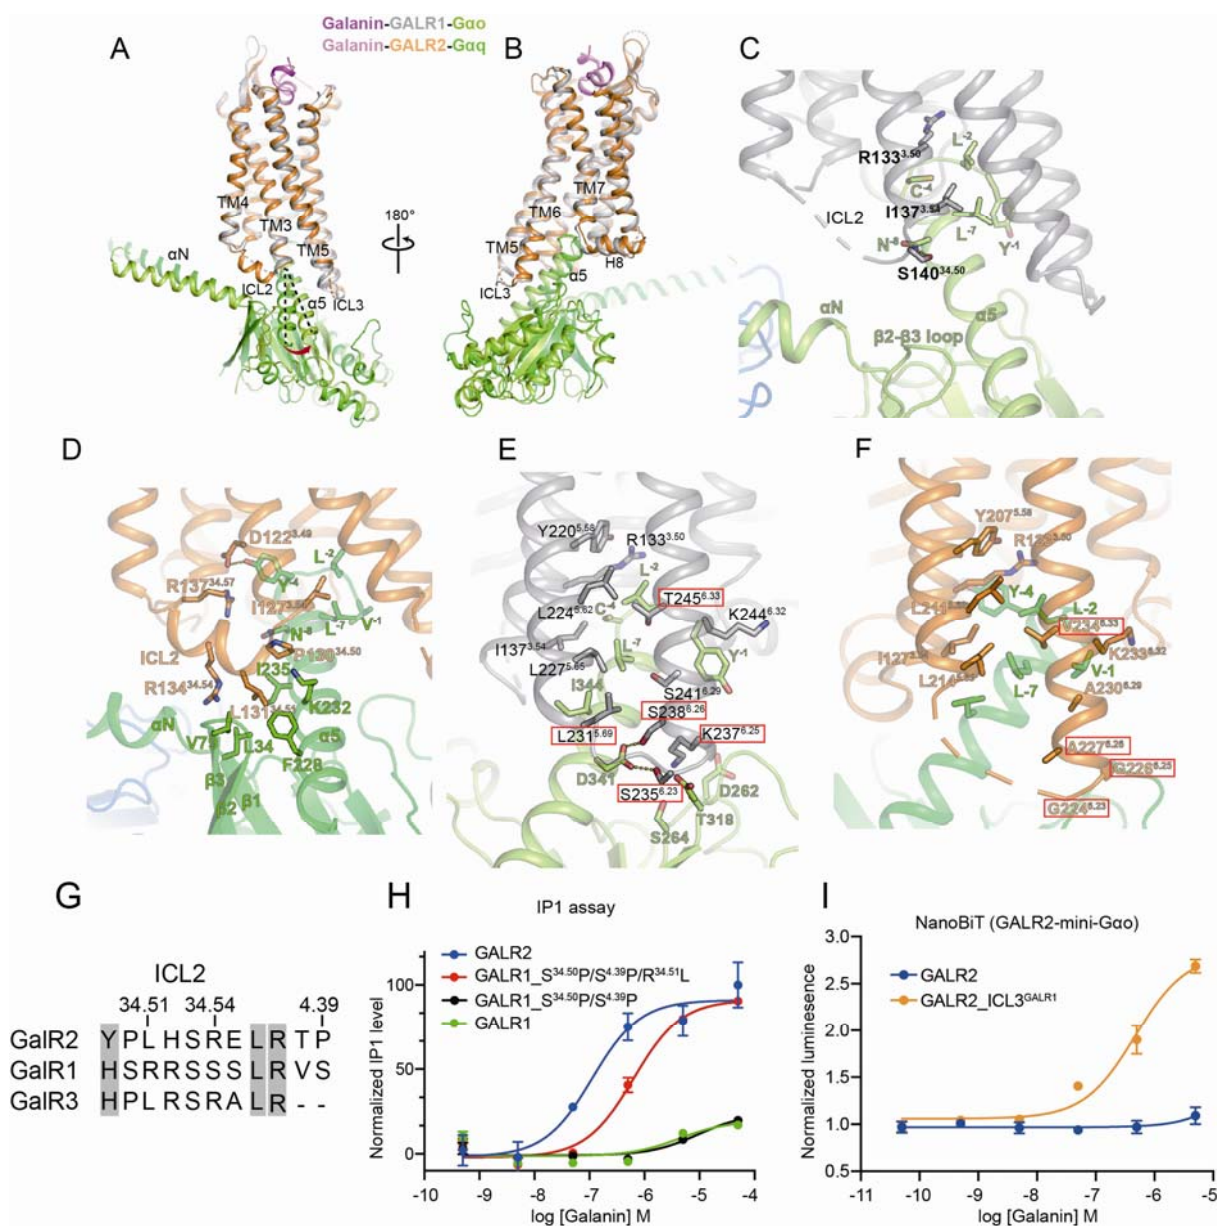

429

430 **Fig. 5. Mechanisms of Go and Gq selectivity in the GALR receptor family.**

431 (A) and (B) Structural superposition of GALR1-Gao and GALR2-Gaq in two opposite views.

432 Receptors are aligned.

433 (C) Interaction details between ICL2 of GALR1 and Gao.

434 (D) Interaction details between ICL2 of GALR2 and Gaq.

435 (E) Interaction details between TM5 and TM6 of GALR1 and Gao.

436 (F) Interaction details between TM5 and TM6 of GALR2 and Gaq.

437 (G) Sequence alignment of ICL2 from GALR receptor family.

438 (H) The IP1 accumulation assay evaluating the effects of ICL2 substitutions in GALR1 on  
439 GALR1-Gq coupling. All mutants are expressed at similar levels as WT.

440 (I) Substitution of ICL3 in GALR2 with that in GALR1 increases coupling efficiency of GALR2  
441 and Go.

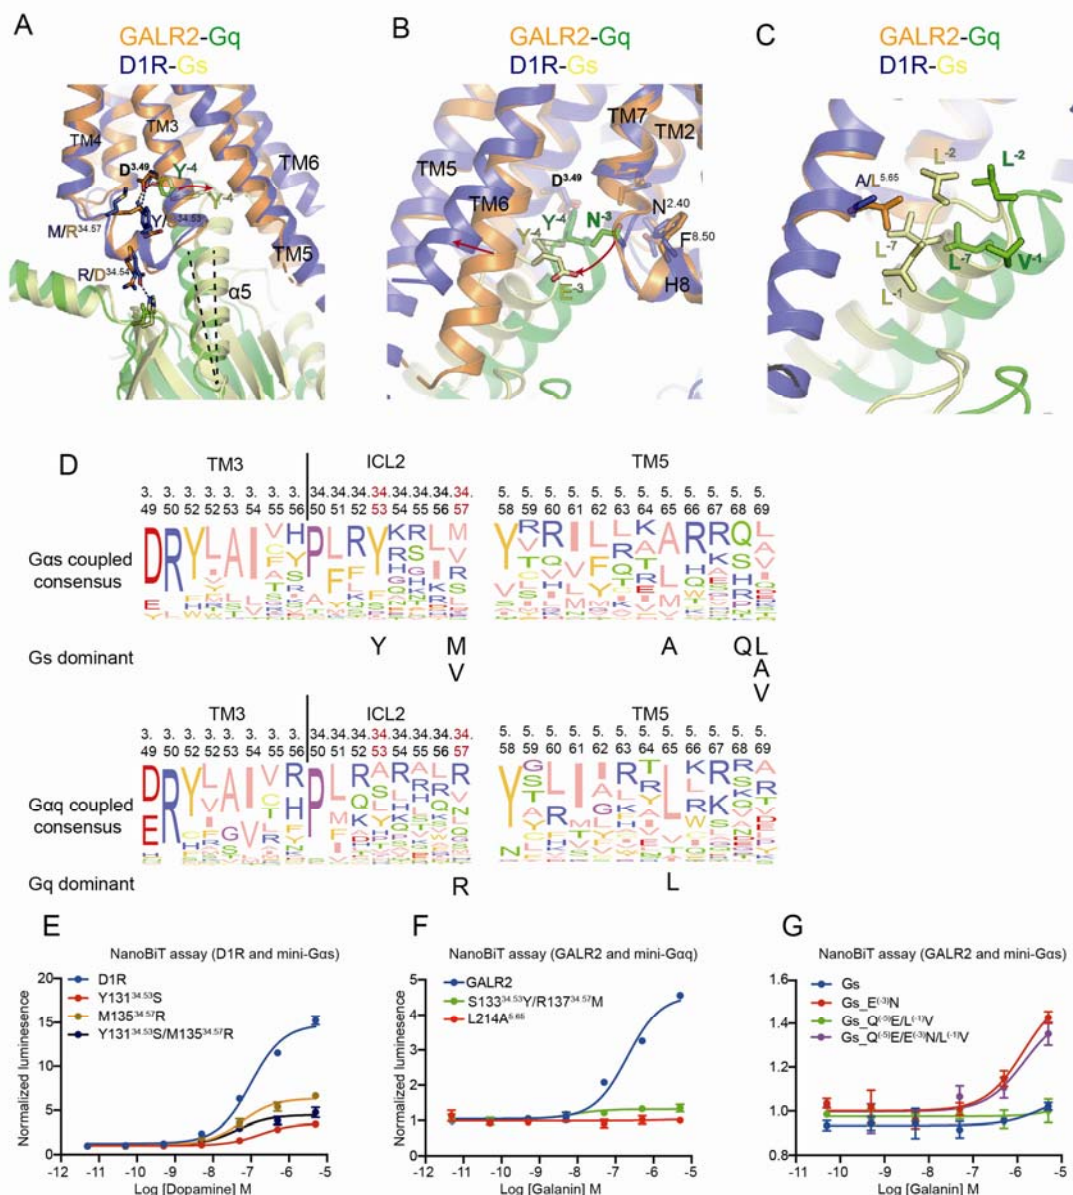

442

443 **Fig. 6. Important structural features in class A GPCRs that determining Gs and Gq**  
 444 **selectivity.**

445 (A) Structural superposition of the GALR2-Gq and the D1R-Gs complexes. Receptors are  
 446 aligned.

447 (B) N(-3) in Gq is inserted into a hydrophobic pocket formed by TM2, TM7 and H8, while  
 448 E(-3) in Gs flips outside this pocket.

449 (C) A<sup>5.65</sup> in D1R is close to the hydrophobic pocket formed by L(-1), L(-2) and L(-7) in Gs,  
 450 while L<sup>5.65</sup> in GALR2 is distant from that in Gq.

451 (D) Sequence alignment of 41 class A Gs-coupled receptors (top) and 44 Gq-coupled  
 452 receptors (bottom). The dominant residues are indicated below the alignments.

453 (E) Mutations of Y<sup>34.53</sup>M<sup>34.57</sup> in the ICL2 of D1R reduce D1R-Gs coupling efficiency.

- 454 (F) Mutations of S<sup>34.53</sup>R<sup>34.57</sup> in the ICL2 of GALR2 almost abolish GALR2 and Gq coupling.  
455 (G) The effects of mutations of the “wavy hook” in Gs on coupling efficiency of GALR2-Gαs,  
456 as evaluated by the NanoBiT assay.

457 **Materials and method**

458 **Cloning**

459 The human GALR1 and GALR2 were cloned into pcDNA3.1(+) vector(Thermo Fisher  
460 Scientific) with an N-terminal hemagglutinin (HA) signal sequence and a FLAG epitope tag  
461 (DYKDDDDK). An engineered mini-G $\alpha$  was fused to the C-terminus of GALR1 (1-349) with  
462 three copies of 3C protease sites between them. GALR2 (1-314) was expressed as a fusion  
463 protein including two repeats of 3C protease site and a mini-G $\alpha$ q sequence in the  
464 C-terminus of GALR2. ScFv16 was cloned into the pFastBac vector (Invitrogen) with an  
465 N-terminal GP64 signal sequence and a C-terminal 3C protease site, followed by an  
466 octa-histidine tag. His6-tagged G $\beta$ 1 and G $\gamma$ 2 (C68S mutation) were cloned in the pFastBac  
467 Dual vector for insect cell expression.

468

469 **Protein expression and purification**

470 The plasmid expressing GALR1-mini-G $\alpha$  or GALR1-mini-G $\alpha$ q was transiently expressed  
471 into Expi293F cells (Thermo Fisher Scientific) using polyethyleneimine (PEI, Polysciences).  
472 Cells were lysed in the lysis buffer (20 mM HEPES, pH 7.4) supplemented with protease  
473 inhibitor cocktail (Roche) using a glass dounce grinder and centrifuged at 1,000 x g for 3  
474 minutes to remove the nucleus. The membrane fraction was pelleted by centrifugation at  
475 65,000x g, at 4 °C for 1 hour, and homogenized in the solubilization buffer containing 20 mM  
476 HEPES pH 7.4, 150 mM NaCl, 1% Lauryl Maltose Neopentyl Glycol (LMNG), 0.2%  
477 Cholesteryl Hemisuccinate (CHS) and 60 nM galanin peptide (1-30). After centrifugation to  
478 remove debris, the supernatant containing solubilized GALRs-mini-G $\alpha$  was supplemented  
479 with 2 mM CaCl<sub>2</sub> and loaded onto the M1 anti-FLAG antibody resin. The resin was washed  
480 with wash buffer containing 20 mM HEPES, pH 7.4, 300 mM KCl, 0.01% LMNG, 0.002%  
481 CHS, 2 mM CaCl<sub>2</sub>, 10 mM MgCl<sub>2</sub>, 2 mM ATP, 6 nM galanin and eluted with elution buffer  
482 containing 20 mM HEPES, pH 7.4, 150 mM NaCl, 0.01% LMNG, 0.002% CHS, 10 mM  
483 EDTA, 0.5 mg/ml 1x FLAG peptide and 60 nM galanin. G $\beta$ <sub>1</sub> $\gamma$ <sub>2</sub> (C68S) and scFv16 were  
484 expressed and purified as previously described (21, 54).



## 485 **Complex assembly**

486 Purified GALR1-miniGo or GALR2-miniGq proteins, G $\beta$ <sub>1</sub> $\gamma$ <sub>2</sub> (C68S) and scFv16 were mixed  
487 with a molar ratio of 1:1.5:2 in 500  $\mu$ l of the equilibration buffer (20 mM HEPES, pH 7.4, 150  
488 mM NaCl, 0.01% LMNG, 0.002% CHS, 60 nM galanin, 0.5  $\mu$ M TCEP) supplemented with 1  
489  $\mu$ l PNGaseF and 0.5  $\mu$ l apyrase. The mixture was incubated on ice for 1 hour and further  
490 purified on a Superose 6 Increase 10/300 column pre-equilibrated with the equilibration  
491 buffer. The peak fractions containing the complex were supplemented with 60  $\mu$ M galanin  
492 and concentrated to about 6 mg/ml. For assembly of the GALR1-miniGao/G $\beta$ <sub>1</sub> $\gamma$ <sub>2</sub> (C68S)  
493 complex with 3C protease site cleaved, similar procedures were performed as above, except  
494 that 3C protease was added before purification on a Superose 6 Increase 10/300 column.  
495 For assembly of the spexin-bound GALR2 complexes, same procedures were performed,  
496 except that galanin was replaced by spexin during the purification process.

497

## 498 **Cryo-EM sample preparation and data collection**

499 300 mesh holey carbon grids (Quantifoil Au R1.2/1.3) were glow-charged, loaded into a  
500 Vitrobot MarkIV instrument chamber (Thermo Fisher Scientific) maintained at 8 °C and 100%  
501 humidity. 3.0  $\mu$ l of GALRs complex samples was applied onto the grid, blotted for 3.0-4.0 s  
502 with a blotting force of 4 before plunge freezing in liquid ethane. Cryo-EM movies were  
503 collected on a Titan Krios microscope equipped with a BioQuantum GIF/K3 direct electron  
504 detector (Gatan) under accelerating voltage of 300 kV at a nominal magnification of 64,000 x.  
505 Each movie stack was collected as 32 frames, with total dose of 50 e<sup>-</sup>/Å<sup>2</sup> for 2.56 s.

506

## 507 **Cryo-EM Data processing**

508 All movie stacks were collected and processed with MotionCor2 for motion correction (55),  
509 with 2x binned to a pixel size of 1.087 Å. Contrast Transfer Function (CTF) estimation was  
510 performed using patch-based CTF estimation in cryoSPARC\_v3 (56). All processed images  
511 were then subjected to particle picking using Blob picker in cryoSPARC, followed by particle  
512 extraction. For the galanin-bound GALR1-mini-Go complex with 3C protease sites cleaved,

513 particles from 1,401 micrographs (Dataset A) were subjected to two rounds of 2D  
514 classification, generating 248,352 good particles. *Ab initio* reconstruction and non-uniform  
515 refinement were performed to get a reference map for GALR1. For the GALR1-mini-Go  
516 fusion protein complex, 886 micrographs (Dataset B) were collected, followed by particle  
517 picking using Blob picker and particle extraction. Particles from the two datasets were  
518 combined and subjected to two rounds of 2D classification, yielding 2,882,487 good particles.  
519 These particles were subjected to global 3D classification in RELION3.1 (57), followed by  
520 another round of 3D classification focused on the receptor. 426,045 particles from the best  
521 class were run through non-uniform refinement in cryoSPARC, resulting in a final 3.3 Å map.

522

523 For the galanin-bound GALR2-mini-Gq fusion protein complex, 1,337 micrographs were  
524 collected, and processing procedures were performed as above. In brief, two rounds of 2D  
525 classification using auto-picked particles resulted in 1,325,739 good particles, which were  
526 subjected to two rounds of 3D classification in RELION3.1 using the GALR1-Go complex  
527 map as initial model. 578,453 particles from three classes with clear secondary structure  
528 features were selected, and subjected to non-uniform refinement in cryoSPARC, resulting in  
529 a final 3.29 Å map. All 3D maps were post-processed with DeepEMhancer (58).

530

531 For the spexin-bound GALR2-mini-Gq complex, 1,139 movies were collected and processed  
532 as above. 1,015,461 good particles were selected from two rounds of 2D classification, and  
533 were subjected to heterogeneous refinement and non-uniform refinement in cryoSPARC.  
534 The final map is about 3.5 Å.

535

### 536 **Model building**

537 Homology models for GALR1 and GALR2 were generated using the structure of  $\mu$  opioid  
538 receptor (PDB: 4DKL) in the SWISS-MODEL server. The homology model of GALR1 and  
539 the structure of mini-Gao/G $\beta$  $\gamma$ /scFv16 (PDB: 7D77) were fitted into the EM map in Chimera  
540 (59). The structure of mini-G $\alpha$ q/G $\beta$  $\gamma$ /scFv16 was extracted from the published structure

541 (PDB: 6WHA), and docked into the EM map together with the homology model of GALR2.  
542 All the models were manually built in COOT (60) and, are subjected to  
543 *real\_space\_refinement* in *Phenix* (61) using the reference structure and secondary structure  
544 restraints. The statistics for structure refinement are summarized in Table S1.

545

#### 546 **cAMP inhibition assay**

547 Chinese hamster ovary (CHO) cells were seeded into six-well plates and cultured overnight  
548 until cell confluence reaches ~80%. Plasmids expressing GALR1 or mutants were  
549 transfected together with the GloSensor biosensor plasmid following a Lipofectamine cell  
550 transfection procedure (Invitrogen). Transfected cells were cultured for 1 day and re-seeded  
551 into 96-well plates by  $3 \times 10^4$  cells per well. After 8 hours post seeding, the medium was  
552 exchanged to CO<sub>2</sub>-independent medium (Gibco) supplemented with 500 µg/ml of D-Luciferin.  
553 Cells were stimulated with various concentration gradients of galanin for 5 minutes, and then  
554 treated with 1 µM forskolin. The bioluminescence signal was constantly measured for 10  
555 minutes, and the peak signal was acquired for the inhibitory dose curve fitting and IC<sub>50</sub>  
556 determination using GraphPad Prism 8 software. Significance analysis was performed using  
557 one-way analysis of variance method (one-way ANOVA in Prism 8).

558

#### 559 **IP1 accumulation assay**

560 Gαq-mediated IP1 accumulation was measured using the IP-ONE Gq HTRF Kit from Cisbio.  
561 HEK-293T cells were seeded into 6-well plates, and 2 µg of GALR2 or mutant plasmids were  
562 transfected using PEI. After 2 days post-transfection, cells were suspended, washed one  
563 time with DPBS (Gibco), resuspended into HBSS buffer (Beyotime) and seeded into 384-well  
564 plates(Greiner) with ~7000 cells per well. Transfected cells were stimulated with various  
565 concentration gradients of galanin for 1 hour and subjected to IP1 accumulation detection  
566 following the assay protocol. Inhibitory dose curve was plotted and IC<sub>50</sub> was determined  
567 using GraphPad Prism 8 (dose-response-inhibitory, three parameters). Significance was  
568 analyzed using One-way ANOVA.

569

### 570 **NanoBiT assay**

571 To monitor the interaction between G proteins and GALR1 or GALR2 upon galanin  
572 stimulation, a NanoLuc-based enzyme complementation system called NanoBiT assay (62)  
573 was used (Promega). The C-terminus of GALR1 or GALR2 was fused with the small  
574 fragment (smBiT), and the large fragment (LgBit) element was fused to the N terminus of  
575 mini-G $\alpha$  proteins. HEK-293T cells were seeded into 6-well plates and transfected with 1  $\mu$ g  
576 of GPCR-smBit and 1  $\mu$ g of LgBit-miniG $\alpha$ . After 2 days post transfection, cells were  
577 suspended, washed with DPBS for one time and resuspended into the assay buffer  
578 containing HBSS supplemented with 0.01% BSA (SIGMA), 10 mM HEPES (Beyotime) and  
579 10  $\mu$ M coelenterazine-h (YEASEN). The culture was equilibrated at room temperature (RT)  
580 for 2 hours and subjected to stimulation with various concentration gradients of galanin and  
581 instant bioluminescence measurement. The bioluminescence signal was acquired in the  
582 time point when the signal went into the stationary phase, and the normalized signal (fold  
583 change) was fitted to a three-parameter sigmoidal concentration-response curve in Prism 8  
584 software.

585

### 586 **Zn<sup>2+</sup> inhibition assay**

587 As zinc produced high background signal in the IP1 accumulation assay and cAMP inhibition  
588 assay, the NanoBiT assay was used to measure the effect of Zn<sup>2+</sup> effect on GALRs signaling.  
589 The same constructs used in the NanoBiT assay were adopted. After 2 days  
590 post-transfection, cells were resuspended and washed twice with the assay buffer (20 mM  
591 HEPES, pH 7.3 and 150 mM NaCl), and resuspended into the assay buffer supplemented  
592 with 10  $\mu$ M coelenterazine-h and seeded into 96-well plates. After 30 minutes of incubation  
593 at RT, cells were stimulated with various concentration gradients of galanin premixed with a  
594 fixed concentration of ZnCl<sub>2</sub>, or 1  $\mu$ M of galanin pre-mixed with titrated concentration of  
595 ZnCl<sub>2</sub>. The bioluminescence signals in the stationary phase were acquired, and were  
596 analyzed using three-parameter dose-response-stimulatory or dose-response-inhibitory

597 fitting methods in Prism 8 software.

598

599

### 600 **Acknowledgements**

601 We thank Dr. Xiangyu Liu at Tsinghua University for providing the plasmid expressing Gβ1γ2.

602 We thank staff at Shuimu BioSciences for their help with cryo-EM data collection. All EM

603 images were collected at Shuimu BioSciences. This work was supported by Chinese

604 Ministry of Science and Technology, Beijing Municipal Science & Technology Commission

605 (Z201100005320012) and Tsinghua University.

606

### 607 **Author contributions**

608 W.J. purified the protein complex, collected cryo-EM data, performed cryo-EM data

609 processing and model building, performed cellular assay with input from S.Z. S.Z. and W.J.

610 wrote the manuscript.

611

### 612 **Competing interests**

613 The authors declare no competing interests.

614

### 615 **Data availability**

616 The atomic structures have been deposited at the Protein Data Bank (PDB) under the

617 accession codes XXX. The EM maps have been deposited at the Electron Microscopy Data

618 Bank (EMDB) under the accession numbers XXX.

619 References

- 620 1. Tatemoto K, Rokaeus A, Jornvall H, McDonald TJ, & Mutt V (1983) Galanin - a novel  
621 biologically active peptide from porcine intestine. *FEBS Lett* 164(1):124-128.
- 622 2. Sipkova J, Kramarikova I, Hynie S, & Klenerova V (2017) The galanin and galanin  
623 receptor subtypes, its regulatory role in the biological and pathological functions.  
624 *Physiol Res* 66(5):729-740.
- 625 3. Lang R, *et al.* (2015) Physiology, signaling, and pharmacology of galanin peptides  
626 and receptors: three decades of emerging diversity. *Pharmacol Rev* 67(1):118-175.
- 627 4. Branchek TA, Smith KE, Gerald C, & Walker MW (2000) Galanin receptor subtypes.  
628 *Trends Pharmacol Sci* 21(3):109-117.
- 629 5. Wang S & Gustafson EL (1998) Galanin receptor subtypes. *Drug News Perspect*  
630 11(8):458-468.
- 631 6. Lin EJ, *et al.* (2003) Recombinant AAV-mediated expression of galanin in rat  
632 hippocampus suppresses seizure development. *Eur J Neurosci* 18(7):2087-2092.
- 633 7. Haberman RP, Samulski RJ, & McCown TJ (2003) Attenuation of seizures and  
634 neuronal death by adeno-associated virus vector galanin expression and secretion.  
635 *Nat Med* 9(8):1076-1080.
- 636 8. Millon C, *et al.* (2019) Role of the galanin N-terminal fragment (1-15) in anhedonia:  
637 Involvement of the dopaminergic mesolimbic system. *J Psychopharmacol*  
638 33(6):737-747.
- 639 9. Li SY, *et al.* (2017) Involvement of galanin and galanin receptor 1 in nociceptive

- 640 modulation in the central nucleus of amygdala in normal and neuropathic rats. *Sci*  
641 *Rep* 7(1):15317.
- 642 10. Kokaia M, *et al.* (2001) Suppressed kindling epileptogenesis in mice with ectopic  
643 overexpression of galanin. *Proc Natl Acad Sci U S A* 98(24):14006-14011.
- 644 11. Guipponi M, *et al.* (2015) Galanin pathogenic mutations in temporal lobe epilepsy.  
645 *Hum Mol Genet* 24(11):3082-3091.
- 646 12. Xu XF, *et al.* (2016) Galanin and its receptor system promote the repair of injured  
647 sciatic nerves in diabetic rats. *Neural Regen Res* 11(9):1517-1526.
- 648 13. Elliott-Hunt CR, Pope RJ, Vanderplank P, & Wynick D (2007) Activation of the galanin  
649 receptor 2 (GalR2) protects the hippocampus from neuronal damage. *J Neurochem*  
650 100(3):780-789.
- 651 14. Kroeger D, *et al.* (2018) Galanin neurons in the ventrolateral preoptic area promote  
652 sleep and heat loss in mice. *Nat Commun* 9(1):4129.
- 653 15. Reichert S, Pavon Arocas O, & Rihel J (2019) The Neuropeptide Galanin Is Required  
654 for Homeostatic Rebound Sleep following Increased Neuronal Activity. *Neuron*  
655 104(2):370-384 e375.
- 656 16. Kim DK, *et al.* (2014) Coevolution of the spexin/galanin/kisspeptin family: Spexin  
657 activates galanin receptor type II and III. *Endocrinology* 155(5):1864-1873.
- 658 17. Mills EG, Izzu-Engbeaya C, Abbara A, Comninou AN, & Dhillon WS (2021) Functions of  
659 galanin, spexin and kisspeptin in metabolism, mood and behaviour. *Nat Rev*  
660 *Endocrinol* 17(2):97-113.

- 661 18. Kask K, Berthold M, Kahl U, Nordvall G, & Bartfai T (1996) Delineation of the peptide  
662 binding site of the human galanin receptor. *EMBO J* 15(2):236-244.
- 663 19. Church WB, Jones KA, Kuiper DA, Shine J, & Iismaa TP (2002) Molecular modelling  
664 and site-directed mutagenesis of human GALR1 galanin receptor defines  
665 determinants of receptor subtype specificity. *Protein Eng* 15(4):313-323.
- 666 20. Nehme R, *et al.* (2017) Mini-G proteins: Novel tools for studying GPCRs in their active  
667 conformation. *PLoS One* 12(4):e0175642.
- 668 21. Maeda S, *et al.* (2018) Development of an antibody fragment that stabilizes  
669 GPCR/G-protein complexes. *Nat Commun* 9(1):3712.
- 670 22. Smith KE, *et al.* (1997) Expression cloning of a rat hypothalamic galanin receptor  
671 coupled to phosphoinositide turnover. *J Biol Chem* 272(39):24612-24616.
- 672 23. Fathi Z, *et al.* (1997) Cloning, pharmacological characterization and distribution of a  
673 novel galanin receptor. *Brain Res Mol Brain Res* 51(1-2):49-59.
- 674 24. Carpenter KA, *et al.* (1999) The glycine residue in cyclic lactam analogues of  
675 galanin(1-16)-NH<sub>2</sub> is important for stabilizing an N-terminal helix. *Biochemistry*  
676 38(46):15295-15304.
- 677 25. Barany-Wallje E, Andersson A, Graslund A, & Maler L (2004) NMR solution structure  
678 and position of transportan in neutral phospholipid bicelles. *FEBS Lett*  
679 567(2-3):265-269.
- 680 26. Kruse AC, *et al.* (2013) Activation and allosteric modulation of a muscarinic  
681 acetylcholine receptor. *Nature* 504(7478):101-106.



- 682 27. Shihoya W, *et al.* (2016) Activation mechanism of endothelin ETB receptor by  
683 endothelin-1. *Nature* 537(7620):363-368.
- 684 28. Koehl A, *et al.* (2018) Structure of the micro-opioid receptor-Gi protein complex.  
685 *Nature* 558(7711):547-552.
- 686 29. Hong C, *et al.* (2021) Structures of active-state orexin receptor 2 rationalize peptide  
687 and small-molecule agonist recognition and receptor activation. *Nat Commun*  
688 12(1):815.
- 689 30. Floren A, Land T, & Langel U (2000) Galanin receptor subtypes and ligand binding.  
690 *Neuropeptides* 34(6):331-337.
- 691 31. Land T, *et al.* (1991) Linear and cyclic N-terminal galanin fragments and analogs as  
692 ligands at the hypothalamic galanin receptor. *Int J Pept Protein Res* 38(3):267-272.
- 693 32. Jumper J, *et al.* (2021) Highly accurate protein structure prediction with AlphaFold.  
694 *Nature* 596(7873):583-589.
- 695 33. Maeda S, Qu Q, Robertson MJ, Skiniotis G, & Kobilka BK (2019) Structures of the M1  
696 and M2 muscarinic acetylcholine receptor/G-protein complexes. *Science*  
697 364(6440):552-557.
- 698 34. Moro O, Lamah J, Hogger P, & Sadee W (1993) Hydrophobic amino acid in the i2  
699 loop plays a key role in receptor-G protein coupling. *J Biol Chem*  
700 268(30):22273-22276.
- 701 35. Xiao P, *et al.* (2021) Ligand recognition and allosteric regulation of DRD1-Gs  
702 signaling complexes. *Cell* 184(4):943-956 e918.

- 703 36. Blakemore LJ & Trombley PQ (2017) Zinc as a Neuromodulator in the Central  
704 Nervous System with a Focus on the Olfactory Bulb. *Front Cell Neurosci* 11:297.
- 705 37. Kay AR & Toth K (2008) Is zinc a neuromodulator? *Sci Signal* 1(19):re3.
- 706 38. Anderson CT, *et al.* (2015) Modulation of extrasynaptic NMDA receptors by synaptic  
707 and tonic zinc. *Proc Natl Acad Sci U S A* 112(20):E2705-2714.
- 708 39. Kalappa BI, Anderson CT, Goldberg JM, Lippard SJ, & Tzounopoulos T (2015) AMPA  
709 receptor inhibition by synaptically released zinc. *Proc Natl Acad Sci U S A*  
710 112(51):15749-15754.
- 711 40. Vogt K, Mellor J, Tong G, & Nicoll R (2000) The actions of synaptically released zinc  
712 at hippocampal mossy fiber synapses. *Neuron* 26(1):187-196.
- 713 41. Swaminath G, Steenhuis J, Kobilka B, & Lee TW (2002) Allosteric modulation of  
714 beta2-adrenergic receptor by Zn(2+). *Mol Pharmacol* 61(1):65-72.
- 715 42. Holst B, Elling CE, & Schwartz TW (2002) Metal ion-mediated agonism and agonist  
716 enhancement in melanocortin MC1 and MC4 receptors. *J Biol Chem*  
717 277(49):47662-47670.
- 718 43. Nunez D, Kumar R, & Hanahan DJ (1989) Inhibition of [3H]platelet activating factor  
719 (PAF) binding by Zn<sup>2+</sup>: a possible explanation for its specific PAF antiaggregating  
720 effects in human platelets. *Arch Biochem Biophys* 272(2):466-475.
- 721 44. van der Westhuizen ET, Valant C, Sexton PM, & Christopoulos A (2015) Endogenous  
722 allosteric modulators of G protein-coupled receptors. *J Pharmacol Exp Ther*  
723 353(2):246-260.

- 724 45. Yuan Y, *et al.* (2021) Structures of signaling complexes of lipid receptors S1PR1 and  
725 S1PR5 reveal mechanisms of activation and drug recognition. *Cell Res.*
- 726 46. Xu P, *et al.* (2021) Structures of the human dopamine D3 receptor-Gi complexes. *Mol*  
727 *Cell*81(6):1147-1159 e1144.
- 728 47. Kato HE, *et al.* (2019) Conformational transitions of a neurotensin receptor 1-Gi1  
729 complex. *Nature* 572(7767):80-85.
- 730 48. Liu Q, *et al.* (2021) Ligand recognition and G-protein coupling selectivity of  
731 cholecystokinin A receptor. *Nat Chem Biol.*
- 732 49. Krishna Kumar K, *et al.* (2019) Structure of a Signaling Cannabinoid Receptor 1-G  
733 Protein Complex. *Cell* 176(3):448-458 e412.
- 734 50. Kim HR, *et al.* (2020) Structural mechanism underlying primary and secondary  
735 coupling between GPCRs and the Gi/o family. *Nat Commun* 11(1):3160.
- 736 51. Conklin BR, Farfel Z, Lustig KD, Julius D, & Bourne HR (1993) Substitution of three  
737 amino acids switches receptor specificity of Gq alpha to that of Gi alpha. *Nature*  
738 363(6426):274-276.
- 739 52. Conklin BR, *et al.* (1996) Carboxyl-terminal mutations of Gq alpha and Gs alpha that  
740 alter the fidelity of receptor activation. *Mol Pharmacol* 50(4):885-890.
- 741 53. Semack A, Sandhu M, Malik RU, Vaidehi N, & Sivaramakrishnan S (2016) Structural  
742 Elements in the Galphas and Galphaq C Termini That Mediate Selective G  
743 Protein-coupled Receptor (GPCR) Signaling. *J Biol Chem* 291(34):17929-17940.
- 744 54. Zheng S, Abreu N, Levitz J, & Kruse AC (2019) Structural basis for KCTD-mediated

- 745 rapid desensitization of GABAB signalling. *Nature* 567(7746):127-131.
- 746 55. Zheng SQ, *et al.* (2017) MotionCor2: anisotropic correction of beam-induced motion  
747 for improved cryo-electron microscopy. *Nat Methods* 14(4):331-332.
- 748 56. Punjani A, Rubinstein JL, Fleet DJ, & Brubaker MA (2017) cryoSPARC: algorithms for  
749 rapid unsupervised cryo-EM structure determination. *Nat Methods* 14(3):290-296.
- 750 57. Scheres SH (2012) RELION: implementation of a Bayesian approach to cryo-EM  
751 structure determination. *J Struct Biol* 180(3):519-530.
- 752 58. Sanchez-Garcia R, *et al.* (2020) DeepEMhancer: a deep learning solution for cryo-EM  
753 volume post-processing. *BioRxiv*.
- 754 59. Pettersen EF, *et al.* (2004) UCSF Chimera--a visualization system for exploratory  
755 research and analysis. *J Comput Chem* 25(13):1605-1612.
- 756 60. Emsley P & Cowtan K (2004) Coot: model-building tools for molecular graphics. *Acta*  
757 *Crystallogr D Biol Crystallogr* 60(Pt 12 Pt 1):2126-2132.
- 758 61. Adams PD, *et al.* (2010) PHENIX: a comprehensive Python-based system for  
759 macromolecular structure solution. *Acta Crystallogr D Biol Crystallogr* 66(Pt  
760 2):213-221.
- 761 62. Inoue A, *et al.* (2019) Illuminating G-Protein-Coupling Selectivity of GPCRs. *Cell*  
762 177(7):1933-1947 e1925.
- 763
